# Supplementary material
Source: PubMed Central journal article supplement (PMC2567113)
Supplement: NIHMS66438-supplement-Supplemental_d.pdf [file NIHMS66438-supplement-Supplemental_d.pdf]

| Cisplatin Phenotype (uM) | SNP        | Chromosome | cM Region | Physical Location (bp) | Cytotoxicity p value | Gene   | Adjusted R Squared | % FDR (Apoptosis) |
|--------------------------|------------|------------|-----------|------------------------|----------------------|--------|--------------------|-------------------|
| 1                        | rs7131224  | 11         | 31.65     | 24204107               | 1E-04                |        | 0.1626221          | 0.4802988         |
| 1                        | rs7113868  | 11         | 52.29     | 43095235               | 1E-04                |        |                    |                   |
| 1                        | rs7119153  | 11         | 52.3      | 43113886               | 9.12011E-05          |        |                    |                   |
| 1                        | rs7949504  | 11         | 52.3      | 43108901               | 9.12011E-05          |        |                    |                   |
| 2.5                      | rs17041972 | 4          | 116.31    | 111766204              | 9.12011E-05          | PITX2  | 0.01233173         | 2.838514          |
| 2.5                      | rs17624452 | 4          | 116.31    | 111765489              | 9.12011E-05          | PITX2  | 0.01233173         | 2.838514          |
| 2.5                      | rs17041968 | 4          | 116.31    | 111764044              | 1E-04                | PITX2  |                    |                   |
| 5                        | rs4834232  | 4          | 128.93    | 129243723              | 1E-04                | LARP2  | 0.1044255          | 1.361835          |
| 5                        | rs11944754 | 4          | 140.47    | 140779187              | 1E-04                |        | 0.1467887          | 1.361835          |
| 5                        | rs1028074  | 8          | 155.4     | 138562234              | 5.01187E-05          |        | 0.04786185         | 1.672941          |
| 10                       | rs12795809 | 11         | 52.32     | 43147152               | 4.0738E-05           |        | 0.01413471         | 2.838514          |
| 10                       | rs17758876 | 16         | 115.71    | 82074474               | 1E-04                | CDH13  |                    |                   |
| 10                       | rs1026686  | 3          | 46.25     | 21481066               | 1E-04                | ZNF659 | 0.01695236         | 2.83154           |
| 10                       | rs3860575  | 3          | 46.26     | 21490709               | 1E-04                | ZNF659 | 0.01695236         | 2.838514          |
| 10                       | rs10510534 | 3          | 47.64     | 23023176               | 5.01187E-05          |        | 0.05472964         | 1.422621          |
| 10                       | rs17018468 | 3          | 51.04     | 26662581               | 5.01187E-05          | LRRC3B |                    |                   |
| 10                       | rs7652737  | 3          | 51.04     | 26660236               | 7.07946E-05          | LRRC3B | 0.01387576         | 3.14839           |
| 20                       | rs2278782  | 4          | 116.31    | 111761603              | 1E-04                | PITX2  |                    |                   |
| 20                       | rs7683488  | 4          | 127.96    | 127536433              | 1E-04                |        | 0.0890424          | 2.838514          |
| 20                       | rs6848982  | 4          | 128.89    | 129178663              | 1E-04                |        | 0.1275304          | 1.361835          |
